# Supplementary material for: The mitochondrial genome of Paragonimus westermani (Kerbert, 1878), the Indian isolate of the lung fluke representative of the family Paragonimidae (Trematoda)
Source: PubMed Central journal article supplement (PMC4137670; doi:10.7717/peerj.484), 2014-08-12
Supplement: peerj-02-484-s001.pdf [file peerj-02-484-s001.pdf]

**SO\_1994:**

**Gel pic 1: (set 1)**

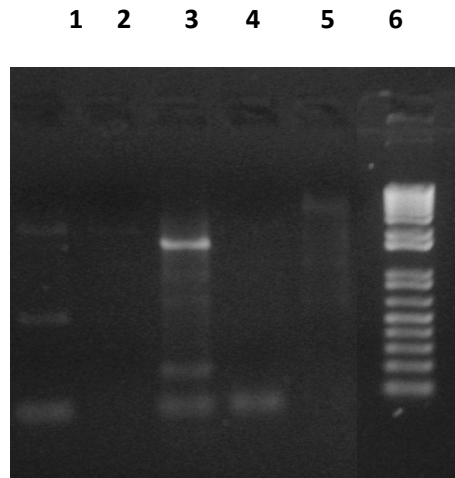

| <b>LANE</b> | <b>SAMPLE</b>    |
|-------------|------------------|
| 2           | 2F+2R            |
| 3           | 3F+3R            |
| 4           | 4F+4R            |
| 5           | Null             |
| 6           | 6F+6R            |
| L           | 1 KB Plus Ladder |

**Primer sequences:**

|     |                          |
|-----|--------------------------|
| 2_F | TGAGAGGTATCTTCAGGCGGA    |
| 2_R | ACAACGTGTAAACCTCGCAGAA   |
| 3_F | TTCTCTTTCTGTGGCTTGCTTATG |
| 3_R | AGATAAAGCAGAACATCACCGGA  |
| 4_F | AAAGTGGTTTGTGTGCTGTCCTT  |
| 4_R | AACTACCATGTCGCGACCG      |
| 6_F | TGCTGCGATCACCATGCT       |
| 6_R | ATGAGACCTCTCCTCGCCTCT    |

## Gel pic 2: (set 3)

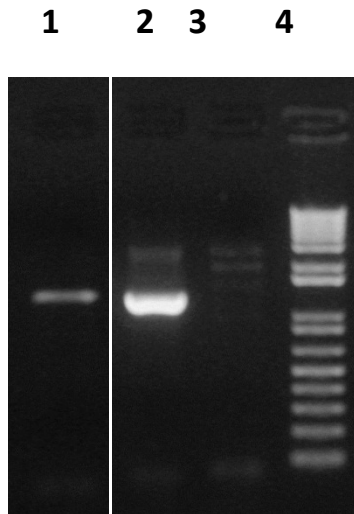

| LANE | SAMPLE           |
|------|------------------|
| 1    | 1 KB Plus Ladder |
| 2    | 3F+3R            |
| 3    | 9F+9R            |
| 4    | Null             |
| 5    | 1kb+ ladder      |

### Primer sequences:

|    |                       |
|----|-----------------------|
| 3F | ATGGTGTGGATGTTGAGAGG  |
| 3R | ACCAACGCTTCCCATCTAACT |
| 9F | TGAGGGGTTTTCTACTGCTT  |
| 9R | AAAAGCTGCAACAAACAAAGC |

**Gel pic 3: (set2)**

**1 2 3 4 5 6 7 8**

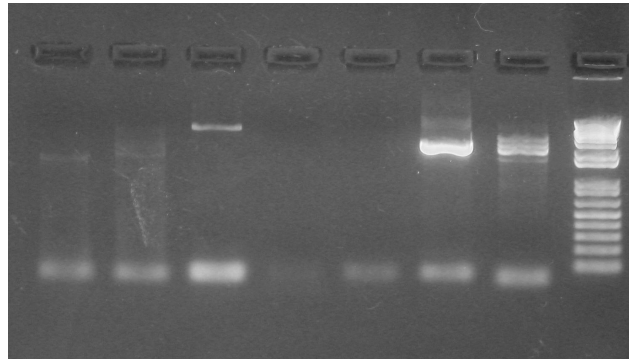

| <b>LANE</b> | <b>SAMPLE</b> |
|-------------|---------------|
| 1           | 2F+3R         |
| 2           | 3F+4R         |
| 3           | 5F+6R         |
| 4           | Nill          |
| 5           | Nill          |
| 6           | 7F+8R         |
| 7           | 8F+9R         |
| 8           | 1Kb+ Ladder   |

**Primer sequences:**

|    |                        |
|----|------------------------|
| 2F | ACAATTCCTGGATGTTTCTCGT |
| 3R | ACCAACGCTTCCCATCTAACT  |
| 3F | ATGGTGTTGGATGTTGAGAGG  |
| 4R | TCACACGACACCCTTCCTTA   |
| 5F | TTAAGGAAAGGGTGCCTGTG   |
| 6R | GGCCCACTGATGTAAATCCT   |
| 7F | CTCGTGTTTAGTGGGTGTCGT  |
| 8R | AAGCAGTAGGAAAACCCCTCA  |
| 8F | CGTTTGGTTCAGATGCTTTGT  |
| 9R | AAAAGCTGCAACAAACAAAGC  |

### Gel pic 4: (set 3)

1 2 3

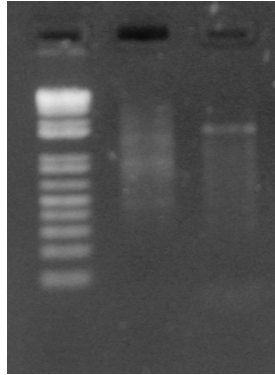

| Lane | Sample      |
|------|-------------|
| 1    | 1kb+ Ladder |
| 2    | Nil         |
| 3    | 3F+4R       |

#### Primer sequences:

|     |                      |
|-----|----------------------|
| 3_F | TGGTGATGCTCGCTTGTGAC |
| 4_R | ACTACACCCATTGCCTCGG  |

### Gel pic 5:(set3)

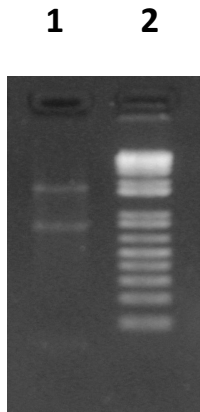

| Lane | Sample      |
|------|-------------|
| 1    | 6F+6R       |
| 2    | 1kb+ Ladder |

#### Primer sequences:

|        |                       |
|--------|-----------------------|
| PWG6_F | CTGGCGGCTCTTTCTGTAG   |
| PWG6_R | ACGAACAACCACACATAATCC |

## Gel pic 6:(set3)

1 2 3 4

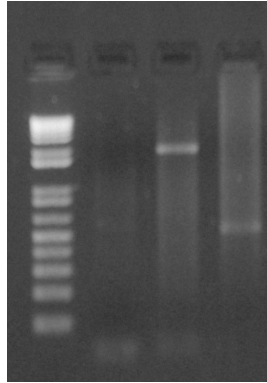

| Lane | Sample      |
|------|-------------|
| 1    | 1kb+ Ladder |
| 2    | Nil         |
| 3    | 2F+3R       |
| 4    | 3F+3R       |

### Primer sequences:

|     |                      |
|-----|----------------------|
| 3_F | TGGTGATGCTCGCTTGTGAC |
| 3_R | CGAGCACTGTCAGTGTGG   |
| 2_F | AGGTCAATGTGCTGCTTACG |
| 3_R | CGAGCACTGTCAGTGTGG   |

**Gel pic 7:(set3)**

**1    2**

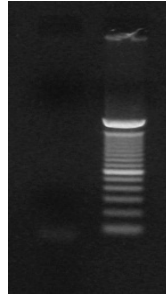

| <b>Lane</b> | <b>Sample</b> |
|-------------|---------------|
| 1           | 7F+7R         |
| 2           | 1kb+ Ladder   |

**Primer sequences:**

|            |                       |
|------------|-----------------------|
| <b>7_F</b> | CTTTAGAATGGGTGATGGTTG |
| <b>7_R</b> | CTACAGAAAGAGCCGCCAG   |
